# Supplementary material
Source: publisher site journal article supplement (https://www.dovepress.com/article/321197)
Supplement: Supplementary file 1 [file get_supplementary_file.php]

# Supplemental File

**Table S1.** Exercise Vital Sign questions and mode of use in SPACE study

Exercise Vital Sign (EVS) was used to evaluate the patients’ self-reported physical activity level. EVS is based on two questions that capture the regular physical activity (PA), as described in the Table S1. In the SPACE study, the Investigators used these questions during the clinical interview with patients to assess the level of PA, as reported by patients. The responses were further entered into the electronic case report form, without displaying the category derived.

| EVS Questions | Response choices |
| --- | --- |
| Question 1: “On average, how many days per week do you engage in moderate to strenuous (vigorous) exercise (like a brisk walk)?” | Categorical: 0 – 7 |
| Question 2: “On average, how many minutes do you engage in exercise at this level?” | Categorical: Minutes are recorded as 0, 10, 20, 30, 40, 50, 60, 90, 120 and 150 min or greater. |
| Total minutes per week of moderate of vigorous physical activity | = Response to Question 1 X Response to Question 2  Three categories can derive:   - inactive (0 min/week), - insufficiently active (1–149 min/week) or - active, meeting PA recommendations (≥150 min/week). |

**Table S2.** The respiratory and non-respiratory comorbiditiesreported in the Romanian group of patients from SPACE study

| **Comorbidity** | Patients  (N=406) |
| --- | --- |
| Non-respiratory |  |
| Cardio-vascular diseases | 304 (74.9) |
| Hypertension | 257 (63.3) |
| Atrial fibrillation/flutter | 30 (7.4) |
| Coronary heart disease | 136 (33.5) |
| Cerebrovascular disease | 18 (4.4) |
| Peripheral artery disease | 31 (7.6) |
| Chronic heart failure | 79 (19.5) |
| Congestive heart failure | 28 (6.9) |
| Anxiety | 25 (6.2) |
| Depression | 19 (4.7) |
| Liver cirrhosis | 8 (2.0) |
| Gastric/duodenal ulcer | 30 (7.4) |
| Osteoporosis | 17 (4.2) |
| Cancer | 21 (5.2) |
| Lung cancer | 1 (0.2) |
| Respiratory diseases |  |
| Asthma | 27 (6.7) |
| Pulmonary fibrosis | 29 (7.1) |
| Pneumococcal vaccination | 11 (2.7) |
| Influenza vaccination | 133 (32.8) |

**Note**: all values are presented as n (%).
